# Supplementary material for: Norms for Automatic Estimation of Hippocampal Atrophy and a Step Forward for Applicability to the Italian Population
Source: Front Neurosci. 2021 Jun 28;15:656808. doi: 10.3389/fnins.2021.656808 (PMC8273578; doi:10.3389/fnins.2021.656808)
Supplement: Supplementary file 8 [file Table_1.XLSX]

## Sheet: Foglio1
	Subjectcode	FS	AA		Legend
	002_S_0295					Correct hippocampal segmentation
	002_S_0413					Hippocampal segmentation error
	002_S_0559
	002_S_0685
	002_S_1261
	002_S_1280
	002_S_4213
	002_S_4225
	002_S_4262
	002_S_4264
	002_S_4270
	002_S_6007
	002_S_6009
	002_S_6030
	002_S_6053
	002_S_6066
	002_S_6103
	003_S_0907
	003_S_0931
	003_S_0981
	003_S_1021
	003_S_4288
	003_S_4644
	003_S_6014
	003_S_6067
	003_S_6092
	003_S_6256
	003_S_6257
	003_S_6259
	005_S_0223
	005_S_0553
	005_S_0602
	005_S_0610
	006_S_0484
	006_S_0498
	006_S_0681
	006_S_0731
	006_S_4150
	006_S_4357
	006_S_4449
	006_S_4485
	006_S_6209
	006_S_6234
	006_S_6277
	006_S_6375
	006_S_6500
	007_S_0068
	007_S_0070
	007_S_1206
	007_S_1222
	007_S_4387
	007_S_4488
	007_S_4620
	007_S_4637
	007_S_6120
	007_S_6255
	007_S_6310
	009_S_0751
	009_S_0842
	009_S_0862
	009_S_4337
	009_S_4388
	009_S_4612
	010_S_0067
	010_S_0419
	010_S_0420
	010_S_0472
	010_S_4345
	010_S_4442
	011_S_0002
	011_S_0005
	011_S_0008
	011_S_0016
	011_S_0021
	011_S_0022
	011_S_0023
	011_S_4075
	011_S_4105
	011_S_4120
	011_S_4222
	011_S_4278
	011_S_6367
	012_S_0637
	012_S_1009
	012_S_1133
	012_S_1212
	012_S_4026
	012_S_4545
	012_S_4642
	012_S_4643
	013_S_0502
	013_S_0575
	013_S_1035
	013_S_1276
	013_S_4579
	013_S_4580
	013_S_4616
	013_S_4731
	014_S_0519
	014_S_0520
	014_S_0548
	014_S_4080
	014_S_4093
	014_S_4401
	014_S_4576
	014_S_4577
	014_S_6076
	014_S_6145
	014_S_6148
	014_S_6199
	014_S_6366
	016_S_0359
	016_S_0538
	016_S_4951
	016_S_4952
	016_S_6381
	018_S_0043
	018_S_0055
	018_S_0369
	018_S_0425
	018_S_4257
	018_S_4313
	018_S_4349
	018_S_4399
	018_S_4400
	018_S_6207
	018_S_6351
	019_S_4367
	019_S_4835
	019_S_6186
	020_S_0097
	020_S_0883
	020_S_0899
	020_S_1288
	020_S_6185
	020_S_6227
	020_S_6282
	020_S_6358
	021_S_0159
	021_S_0337
	021_S_0647
	021_S_0984
	022_S_0014
	022_S_0066
	022_S_0096
	022_S_0130
	022_S_4173
	022_S_4196
	022_S_4266
	022_S_4291
	022_S_4320
	022_S_6069
	023_S_0031
	023_S_0058
	023_S_0061
	023_S_0081
	023_S_0926
	023_S_0963
	023_S_1190
	023_S_1306
	023_S_4020
	023_S_4164
	023_S_4448
	023_S_6270
	023_S_6346
	023_S_6374
	023_S_6399
	024_S_0985
	024_S_1063
	024_S_4084
	024_S_4158
	024_S_6005
	024_S_6184
	024_S_6202
	027_S_0074
	027_S_0118
	027_S_0120
	027_S_0403
	029_S_0824
	029_S_0843
	029_S_0845
	029_S_0866
	031_S_0618
	031_S_4021
	031_S_4032
	031_S_4218
	031_S_4474
	031_S_4496
	032_S_0095
	032_S_0479
	032_S_0677
	032_S_1169
	032_S_4277
	032_S_4304
	032_S_4348
	032_S_4386
	032_S_4429
	032_S_4921
	032_S_6211
	032_S_6279
	033_S_0516
	033_S_0734
	033_S_0741
	033_S_0920
	033_S_0923
	033_S_1016
	033_S_1086
	033_S_1098
	033_S_4176
	033_S_4177
	033_S_4179
	033_S_4505
	033_S_4508
	033_S_6266
	033_S_6298
	033_S_6352
	035_S_0048
	035_S_0156
	035_S_0555
	035_S_4082
	035_S_4464
	035_S_6156
	035_S_6160
	035_S_6195
	035_S_6200
	035_S_6306
	036_S_0576
	036_S_0672
	036_S_0813
	036_S_1023
	036_S_4389
	036_S_4491
	036_S_4878
	036_S_6088
	036_S_6189
	036_S_6316
	037_S_0303
	037_S_0327
	037_S_0454
	037_S_0467
	037_S_4028
	037_S_4071
	037_S_4308
	037_S_4410
	037_S_6031
	037_S_6032
	037_S_6046
	037_S_6115
	037_S_6144
	037_S_6187
	037_S_6204
	037_S_6271
	041_S_0125
	041_S_0262
	041_S_0898
	041_S_1002
	041_S_4014
	041_S_4037
	041_S_4041
	041_S_4060
	041_S_4083
	041_S_4200
	041_S_4427
	041_S_4509
	041_S_6136
	041_S_6159
	041_S_6192
	041_S_6226
	041_S_6292
	041_S_6314
	051_S_1123
	052_S_0951
	052_S_1250
	052_S_1251
	053_S_4578
	057_S_0643
	057_S_0779
	057_S_0818
	057_S_0934
	062_S_0578
	062_S_0768
	062_S_1099
	067_S_0019
	067_S_0024
	067_S_0056
	067_S_0059
	067_S_0177
	067_S_0257
	067_S_6045
	067_S_6117
	068_S_0127
	068_S_0210
	068_S_0473
	068_S_1191
	068_S_4174
	068_S_4340
	068_S_4424
	070_S_4856
	070_S_5040
	072_S_0315
	072_S_4103
	072_S_4391
	073_S_0089
	073_S_0311
	073_S_0312
	073_S_0386
	073_S_4155
	073_S_4382
	073_S_4393
	073_S_4552
	073_S_4559
	073_S_4739
	073_S_4762
	073_S_4795
	073_S_5023
	082_S_0304
	082_S_0363
	082_S_0640
	082_S_0761
	082_S_1256
	082_S_4090
	082_S_4208
	082_S_4224
	082_S_4339
	082_S_4428
	082_S_6197
	082_S_6283
	082_S_6287
	094_S_0489
	094_S_0526
	094_S_0692
	094_S_0711
	094_S_1241
	094_S_1267
	094_S_4649
	094_S_6250
	094_S_6269
	094_S_6275
	098_S_0171
	098_S_0172
	098_S_0896
	099_S_0040
	099_S_0090
	099_S_0352
	099_S_0533
	099_S_0534
	099_S_4076
	099_S_4086
	099_S_4104
	100_S_0015
	100_S_0035
	100_S_0047
	100_S_0069
	100_S_1286
	100_S_4469
	100_S_4511
	100_S_5246
	100_S_6164
	100_S_6308
	100_S_6349
	100_S_6493
	109_S_0840
	109_S_0876
	109_S_0967
	109_S_1013
	109_S_1014
	109_S_6213
	109_S_6218
	114_S_0166
	114_S_0173
	114_S_0416
	114_S_0601
	114_S_6057
	114_S_6063
	114_S_6113
	114_S_6251
	116_S_0360
	116_S_0382
	116_S_0648
	116_S_0657
	116_S_1232
	116_S_1249
	116_S_4010
	116_S_4043
	116_S_4092
	116_S_4453
	116_S_4483
	116_S_4855
	116_S_6119
	116_S_6129
	116_S_6133
	123_S_0072
	123_S_0106
	123_S_0113
	123_S_0298
	123_S_4362
	123_S_6118
	126_S_0405
	126_S_0506
	126_S_0605
	126_S_0680
	127_S_0259
	127_S_0260
	127_S_0622
	127_S_0684
	128_S_0229
	128_S_0230
	128_S_0245
	128_S_0272
	128_S_0500
	128_S_0522
	128_S_0545
	128_S_0863
	128_S_1242
	128_S_4586
	128_S_4599
	128_S_4607
	128_S_4609
	128_S_4832
	129_S_0778
	130_S_0232
	130_S_0886
	130_S_0969
	130_S_1200
	130_S_4343
	130_S_4352
	130_S_6019
	130_S_6027
	130_S_6035
	130_S_6037
	130_S_6043
	130_S_6105
	130_S_6111
	130_S_6137
	130_S_6161
	130_S_6319
	130_S_6361
	130_S_6372
	130_S_6390
	130_S_6391
	131_S_0123
	131_S_0319
	131_S_0436
	131_S_0441
	131_S_1301
	131_S_6519
	133_S_0433
	133_S_0488
	133_S_0493
	133_S_0525
	135_S_4446
	135_S_4566
	135_S_4598
	136_S_0086
	136_S_0184
	136_S_0186
	136_S_0196
	136_S_4269
	136_S_4433
	136_S_4726
	136_S_4727
	137_S_0283
	137_S_0301
	137_S_0459
	137_S_0686
	137_S_0972
	137_S_4466
	137_S_4482
	137_S_4520
	137_S_4587
	137_S_4632
	137_S_6060
	141_S_0717
	141_S_0726
	141_S_0767
	141_S_0810
	141_S_1094
	141_S_6008
	141_S_6015
	141_S_6042
	141_S_6061
	141_S_6116
	141_S_6178
	141_S_6240
	141_S_6253
	153_S_4125
	153_S_4139
	153_S_4151
	153_S_4372
	153_S_6237
	168_S_6049
	168_S_6051
	168_S_6059
	168_S_6062
	168_S_6064
	168_S_6065
	168_S_6085
	168_S_6086
	168_S_6098
	168_S_6107
	168_S_6108
	168_S_6121
	168_S_6128
	168_S_6131
	168_S_6151
	168_S_6233
	168_S_6281
	168_S_6285
	168_S_6318
	168_S_6320
	168_S_6321
	168_S_6350
	168_S_6371
	168_S_6413
	168_S_6492
	168_S_6561
	177_S_6328
	177_S_6335
	177_S_6408
	177_S_6409
	177_S_6420
	177_S_6448
	301_S_6224
	301_S_6326
	305_S_6157
	305_S_6188
	305_S_6313
	305_S_6438
	941_S_1194
	941_S_1195
	941_S_1197
	941_S_1202
	941_S_1203
	941_S_4066
	941_S_4100
	941_S_4255
	941_S_4292
	941_S_4365
	941_S_4376
	941_S_6044
	941_S_6054
	941_S_6058
	941_S_6080
	941_S_6094
	941_S_6333
	Table Sup 1 shows the whole group of 545 healthy subjects from ADNI used to generate the percentiles and the inclusion or exclusion for AA and FS norms. Acronyms: AA: ACM-Adaboost, FS: FreeSurfer
