# Supplementary material for: Norms for Automatic Estimation of Hippocampal Atrophy and a Step Forward for Applicability to the Italian Population
Source: Front Neurosci. 2021 Jun 28;15:656808. doi: 10.3389/fnins.2021.656808 (PMC8273578; doi:10.3389/fnins.2021.656808)
Supplement: Supplementary file 9 [file Table_2.XLSX]

## Sheet: Sheet
	CLINICAL ASSESSMENT
	ADNI	IBNA and ARWIBO
	Clinical Dementia Rating (CDR)	Sociodemographic and physiological habits
	Hachinski	Subjective memory complaints
	Geriatric Depression Scale (GDS)	Depressive symptoms (Brief Symptom Inventory - BSI)
		Risk factors for dementia
		Somatic complaints
		Drugs abuse
		Physical performance tests
		Pharmacological therapy
		Blood pressure measurement
		Current and past medical
	NEUROPSYCHOLOGICAL ASSESSMENT
	ADNI	IBNA and ARWIBO
	Mini Mental State Examination (MMSE)	Mini Mental State Examination (MMSE)
	Alzheimer’s Disease Assessment Scale – Cognitive Subscale (ADAS-Cog)	Babcock
	Logical memory I	Logical memory
	Rey Auditory Verbal Learning Test	Rey Auditory Verbal Learning Test
	Montreal Cognitive Assessment (MoCA)	Rey figure recall
	Clock Drawing	Clock drawing
	Category Fluency (animals)	Category Fluency (car brands, fruits, animals)
	Letter Fluency (F)	Letter fluency (FPL)
	Trail Making Test A (TMT-A)	Trail Making Test A (TMT-A)
	Trail Making Test B (TMT-B)	Trail Making Test B (TMT-B)
	Boston Naming Test (30 items)	Rey figure copy
	Digit Span	Digit span
	Logical Memory II (30-40 minute delay)
	Rey Auditory Verbal Learning Test (30 minute Delay)
	Table Sup 2 shows clinical and neuropsychological assessment tests administered in ADNI, IBNA and ARWIBO
