# Supplementary material for: Norms for Automatic Estimation of Hippocampal Atrophy and a Step Forward for Applicability to the Italian Population
Source: Front Neurosci. 2021 Jun 28;15:656808. doi: 10.3389/fnins.2021.656808 (PMC8273578; doi:10.3389/fnins.2021.656808)
Supplement: Supplementary file 10 [file Table_3.XLSX]

## Sheet: Sheet1
	Test-retest on 100 ADNI subjects
		Left HV AA	Right HV AA	Left HV FS	Right HV FS
	Epsilon*	0.0151	0.0137	0.0346	0.027
	P-value	<0.001	<0.001	<0.001	<0.001
	Correlation Coefficient	0.966	0.964	0.874	0.9
	*Epsilon=(Vtest-Vretest)/((Vtest+Vretest)/2)
	Table Sup 3 shows the test-retest performances on 100 subjects from ADNI. P-values and the correlation coefficients were computed with the Pearson’s test. Acronyms: HV: Hippocampal Volume, AA: ACM-Adaboost, FS: FreeSurfer, Epsilon: reproducibility error
