# Supplementary material for: Norms for Automatic Estimation of Hippocampal Atrophy and a Step Forward for Applicability to the Italian Population
Source: Front Neurosci. 2021 Jun 28;15:656808. doi: 10.3389/fnins.2021.656808 (PMC8273578; doi:10.3389/fnins.2021.656808)
Supplement: Supplementary file 11 [file Table_4.XLSX]

## Sheet: FS Normative
	AGE	5th	10th	25th	50th	75th	90th	95th	5th	10th	25th	50th	75th	90th	95th
	Left								Right
	56	3222.8	3350.77	3572.17	3829.43	4098.77	4351.66	4507.82	3455.56	3587.36	3815.09	4079.25	4355.34	4614.18	4773.84
	57	3208.19	3336.28	3557.92	3815.53	4085.28	4338.63	4495.09	3424.88	3556.76	3784.69	4049.18	4325.73	4585.1	4745.13
	58	3193.22	3321.41	3543.27	3801.18	4071.33	4325.09	4481.84	3394.29	3526.24	3754.35	4019.18	4296.18	4556.06	4716.44
	59	3177.52	3305.77	3527.79	3785.95	4056.42	4310.54	4467.53	3363.65	3495.65	3723.94	3989.07	4266.49	4526.87	4687.6
	60	3160.79	3289.07	3511.16	3769.48	4040.18	4294.56	4451.75	3332.8	3464.84	3693.27	3958.67	4236.49	4497.33	4658.4
	61	3142.68	3270.92	3493	3751.36	4022.16	4276.7	4434	3301.56	3433.61	3662.13	3927.75	4205.91	4467.18	4628.54
	62	3122.97	3251.11	3473.05	3731.3	4002.06	4256.62	4413.95	3269.76	3401.79	3630.35	3896.12	4174.56	4436.18	4597.8
	63	3101.75	3229.71	3451.39	3709.41	3979.99	4234.43	4391.72	3237.35	3369.32	3597.85	3863.7	4142.34	4404.25	4566.09
	64	3079.09	3206.81	3428.12	3685.77	3956.03	4210.22	4367.38	3204.24	3336.12	3564.55	3830.41	4109.17	4371.28	4533.3
	65	3054.97	3182.39	3403.21	3660.36	3930.16	4183.97	4340.92	3170.35	3302.08	3530.34	3796.11	4074.89	4337.12	4499.26
	66	3029.36	3156.4	3376.62	3633.13	3902.32	4155.62	4312.27	3135.58	3267.11	3495.11	3760.69	4039.39	4301.65	4463.85
	67	3002.19	3128.78	3348.27	3603.99	3872.41	4125.05	4281.32	3099.87	3231.15	3458.79	3724.07	4002.58	4264.76	4426.95
	68	2973.32	3099.39	3318	3572.77	3840.26	4092.07	4247.86	3063.22	3194.2	3421.39	3686.26	3964.45	4226.44	4388.56
	69	2942.5	3067.95	3285.53	3539.16	3805.51	4056.32	4211.51	3025.68	3156.29	3382.94	3647.28	3925.05	4186.74	4348.72
	70	2909.27	3033.99	3250.34	3502.59	3767.58	4017.15	4171.6	2987.29	3117.49	3343.49	3607.2	3884.43	4145.71	4307.48
	71	2873.85	2997.72	3212.66	3463.33	3726.71	3974.83	4128.41	2948.34	3078.07	3303.35	3566.34	3842.94	4103.72	4265.24
	72	2837.18	2960.14	3173.55	3422.49	3684.14	3930.67	4083.29	2909.34	3038.6	3263.12	3525.34	3801.26	4061.51	4222.74
	73	2800.28	2922.32	3134.15	3381.33	3641.18	3886.07	4037.7	2870.84	2999.61	3223.38	3484.84	3760.08	4019.8	4180.75
	74	2764.03	2885.15	3095.44	3340.88	3598.96	3842.25	3992.91	2833.28	2961.59	3184.64	3445.39	3720	3979.23	4139.93
	75	2728.73	2848.96	3057.75	3301.5	3557.88	3799.62	3949.34	2796.8	2924.68	3147.07	3407.17	3681.22	3940.03	4100.51
	76	2694.73	2814.12	3021.49	3263.64	3518.41	3758.68	3907.52	2761.55	2889.03	3110.83	3370.34	3643.91	3902.38	4062.69
	77	2662.8	2781.42	2987.5	3228.22	3481.54	3720.51	3868.57	2727.7	2854.84	3076.12	3335.15	3608.34	3866.56	4026.76
	78	2633.6	2751.57	2956.56	3196.07	3448.18	3686.06	3833.46	2695.43	2822.28	3043.14	3301.81	3574.75	3832.83	3993
	79	2607.7	2725.16	2929.3	3167.87	3419.07	3656.14	3803.07	2664.88	2791.51	3012.06	3270.5	3543.33	3801.41	3961.63
	80	2585.76	2702.87	2906.46	3144.45	3395.09	3631.7	3778.36	2636.21	2762.69	2983.07	3241.43	3514.31	3772.55	3932.92
	81	2568.21	2685.17	2888.53	3126.33	3376.83	3613.36	3760.01	2609.48	2735.89	2956.23	3214.69	3487.79	3746.36	3906.98
	82	2554.61	2671.59	2875.04	3113	3363.74	3600.56	3747.4	2584.47	2710.89	2931.33	3190.02	3463.51	3722.56	3883.53
	83	2544.22	2661.37	2865.16	3103.57	3354.86	3592.25	3739.48	2560.9	2687.38	2908.02	3167.07	3441.09	3700.74	3862.14
	84	2536.08	2653.5	2857.8	3096.88	3348.95	3587.13	3734.87	2538.43	2665.02	2885.93	3145.45	3420.08	3680.45	3842.34
	85	2529.4	2647.16	2852.09	3091.98	3344.97	3584.07	3732.41	2516.78	2643.5	2864.75	3124.8	3400.13	3661.28	3823.7
	86	2523.59	2641.73	2847.37	3088.16	3342.16	3582.27	3731.27	2495.71	2622.6	2844.22	3104.85	3380.93	3642.9	3805.9
	87	2518.42	2636.97	2843.37	3085.12	3340.2	3581.39	3731.09	2475.11	2602.17	2824.21	3085.44	3362.32	3625.16	3788.75
	88	2513.78	2632.77	2839.98	3082.74	3338.96	3581.3	3731.72	2454.89	2582.15	2804.61	3066.48	3344.18	3607.93	3772.14
	89	2509.6	2629.05	2837.11	3080.93	3338.34	3581.86	3733.05	2434.98	2562.44	2785.34	3047.88	3326.43	3591.11	3755.95
	90	2505.74	2625.66	2834.6	3079.52	3338.17	3582.92	3734.89	2415.31	2542.97	2766.33	3029.54	3308.96	3574.59	3740.07
	Table Sup 4 shows the volume thresholds for hippocampal volume computed with FreeSurfer from 56 to 90 years
