# Supplementary material for: Norms for Automatic Estimation of Hippocampal Atrophy and a Step Forward for Applicability to the Italian Population
Source: Front Neurosci. 2021 Jun 28;15:656808. doi: 10.3389/fnins.2021.656808 (PMC8273578; doi:10.3389/fnins.2021.656808)
Supplement: Supplementary file 12 [file Table_5.XLSX]

## Sheet: AA Normative
	AGE	5th	10th	25th	50th	75th	90th	95th	5th	10th	25th	50th	75th	90th	95th
	Left								Right
	56	4583.16	4765.16	5032.76	5300.36	5567.96	5835.56	6017.56	4873.15	5041.48	5288.95	5536.44	5783.92	6031.4	6199.72
	57	4561.33	4744.23	5013.14	5282.05	5550.96	5819.87	6002.77	4843.62	5013.47	5263.18	5512.9	5762.61	6012.33	6182.17
	58	4539.49	4723.29	4993.52	5263.74	5533.97	5804.19	5987.99	4814.04	4985.42	5237.39	5489.36	5741.33	5993.3	6164.68
	59	4517.64	4702.33	4973.88	5245.43	5516.98	5788.53	5973.23	4784.41	4957.34	5211.58	5465.83	5720.08	5974.33	6147.25
	60	4495.77	4681.36	4954.24	5227.12	5500	5772.88	5958.48	4754.74	4929.23	5185.77	5442.31	5698.86	5955.4	6129.89
	61	4473.87	4660.38	4934.6	5208.81	5483.03	5757.25	5943.76	4725.02	4901.09	5159.95	5418.81	5677.67	5936.53	6112.6
	62	4451.97	4639.39	4914.94	5190.51	5466.06	5741.62	5929.05	4695.26	4872.91	5134.11	5395.31	5656.51	5917.71	6095.37
	63	4430.04	4618.38	4895.29	5172.2	5449.11	5726.02	5914.35	4665.43	4844.69	5108.25	5371.81	5635.37	5898.93	6078.19
	64	4408.09	4597.35	4875.62	5153.89	5432.15	5710.42	5899.68	4635.52	4816.39	5082.34	5348.28	5614.22	5880.16	6061.04
	65	4386.13	4576.32	4855.95	5135.58	5415.21	5694.84	5885.02	4605.51	4788.02	5056.37	5324.71	5593.05	5861.4	6043.91
	66	4364.15	4555.27	4836.27	5117.27	5398.27	5679.27	5870.39	4575.42	4759.58	5030.35	5301.12	5571.88	5842.65	6026.81
	67	4342.15	4534.21	4816.59	5098.96	5381.34	5663.71	5855.77	4545.26	4731.09	5004.3	5277.51	5550.73	5823.94	6009.77
	68	4320.14	4513.13	4796.89	5080.65	5364.41	5648.17	5841.17	4515.07	4702.57	4978.26	5253.94	5529.62	5805.3	5992.81
	69	4298.1	4492.04	4777.19	5062.34	5347.49	5632.64	5826.58	4484.88	4674.08	4952.25	5230.43	5508.6	5786.77	5975.97
	70	4276.05	4470.94	4757.49	5044.03	5330.58	5617.12	5812.02	4454.73	4645.64	4926.33	5207.01	5487.7	5768.39	5959.29
	71	4253.98	4449.82	4737.77	5025.72	5313.67	5601.62	5797.47	4424.66	4617.29	4900.52	5183.74	5466.96	5750.18	5942.81
	72	4231.89	4428.69	4718.05	5007.41	5296.78	5586.14	5782.94	4394.7	4589.08	4874.86	5160.64	5446.42	5732.2	5926.58
	73	4209.77	4407.55	4698.33	4989.11	5279.89	5570.66	5768.44	4364.89	4561.02	4849.38	5137.74	5426.11	5714.47	5910.6
	74	4187.65	4386.39	4678.59	4970.8	5263	5555.21	5753.95	4335.22	4533.12	4824.09	5115.06	5406.03	5697	5894.9
	75	4165.5	4365.21	4658.85	4952.49	5246.13	5539.76	5739.48	4305.68	4505.37	4798.97	5092.57	5386.17	5679.77	5879.46
	76	4143.33	4344.02	4639.1	4934.18	5229.26	5524.33	5725.03	4276.24	4477.74	4773.99	5070.25	5366.5	5662.76	5864.25
	77	4121.14	4322.82	4619.35	4915.87	5212.4	5508.92	5710.6	4246.9	4450.21	4749.15	5048.08	5347.01	5645.94	5849.26
	78	4098.93	4301.6	4599.58	4897.56	5195.54	5493.52	5696.19	4217.62	4422.77	4724.41	5026.04	5327.68	5629.31	5834.47
	79	4076.71	4280.37	4579.81	4879.25	5178.69	5478.13	5681.8	4188.41	4395.42	4699.78	5004.14	5308.5	5612.86	5819.87
	80	4054.46	4259.12	4560.03	4860.94	5161.85	5462.76	5667.43	4159.26	4368.14	4675.26	4982.37	5289.48	5596.6	5805.48
	81	4032.19	4237.86	4540.25	4842.63	5145.02	5447.41	5653.07	4130.19	4340.97	4650.85	4960.75	5270.64	5580.53	5791.3
	82	4009.91	4216.58	4520.45	4824.32	5128.19	5432.07	5638.74	4101.2	4313.88	4626.57	4939.27	5251.96	5564.65	5777.33
	83	3987.6	4195.29	4500.65	4806.02	5111.38	5416.74	5624.43	4072.29	4286.89	4602.41	4917.93	5233.45	5548.97	5763.57
	84	3965.28	4173.99	4480.85	4787.71	5094.57	5401.43	5610.14	4043.42	4259.96	4578.34	4896.71	5215.08	5533.46	5750
	85	3942.93	4152.66	4461.03	4769.4	5077.76	5386.13	5595.86	4014.59	4233.09	4554.35	4875.6	5196.85	5518.1	5736.6
	86	3920.57	4131.33	4441.21	4751.09	5060.97	5370.85	5581.61	3985.78	4206.25	4530.41	4854.57	5178.72	5502.88	5723.36
	87	3898.18	4109.98	4421.38	4732.78	5044.18	5355.58	5567.38	3956.95	4179.41	4506.5	4833.59	5160.68	5487.77	5710.24
	88	3875.78	4088.61	4401.54	4714.47	5027.4	5340.33	5553.17	3928.09	4152.57	4482.62	4812.66	5142.71	5472.76	5697.24
	89	3853.35	4067.23	4381.7	4696.16	5010.63	5325.09	5538.97	3899.18	4125.69	4458.73	4791.76	5124.79	5457.83	5684.34
	90	3830.9	4045.84	4361.84	4677.85	4993.86	5309.87	5524.8	3870.22	4098.78	4434.83	4770.87	5106.92	5442.96	5671.52
	Table Sup 5 shows the volume thresholds for hippocampal volume computed with ACM-Adaboost from 56 to 90 years
