# Supplementary material for: Norms for Automatic Estimation of Hippocampal Atrophy and a Step Forward for Applicability to the Italian Population
Source: Front Neurosci. 2021 Jun 28;15:656808. doi: 10.3389/fnins.2021.656808 (PMC8273578; doi:10.3389/fnins.2021.656808)
Supplement: Supplementary file 13 [file Table_6.XLSX]

## Sheet: Sheet1
		P-values (ANOVA)
		ARWiBo (n=100) vs IBNA (n=64)	ARWiBo (n=100) vs ADNI (n=68 in FS, n=55 in AA)	(ARWiBo + IBNA) (n=164) vs ADNI (n=68 in FS, n=55 in AA)
	Left HV FS	0.0614	0.183	0.4685
	Right HV FS	0.106	0.1585	0.3596
	Left HV AA	0.0012	0.2073	0.9541
	Right HV AA	0.0107	0.1097	0.4547
	Table Sup 6 shows the comparison among ARWiBo, IBNA and ADNI hippocampal volumes. P-values were computed with ANOVA. Acronyms: HV: Hippocampal Volume, FS: FreeSurfer, AA: ACM-Adaboost
