# Supplementary material for: Norms for Automatic Estimation of Hippocampal Atrophy and a Step Forward for Applicability to the Italian Population
Source: Front Neurosci. 2021 Jun 28;15:656808. doi: 10.3389/fnins.2021.656808 (PMC8273578; doi:10.3389/fnins.2021.656808)
Supplement: Supplementary file 14 [file Table_7.XLSX]

## Sheet: Sheet1
	DB/Tools			Gender (M/F)		Education (y)		APOE4 carrier
				Variance %	P-value	Variance %	P-value	Variance %	P-value
	ADNI	FS	LH	12.17	<0.05	0	N.S.	1.12	N.S.
			RH	12.06	<0.05	0.64	N.S.	3.07	N.S.
		AA	LH	0.86	N.S.	2.64	N.S.	3.21	N.S.
			RH	1.29	N.S.	2.38	N.S.	0.57	N.S.
	IBNA	FS	LH	4.38	N.S.	0.09	N.S.	0.07	N.S.
			RH	2.53	N.S.	0.01	N.S.	1.57	N.S.
		AA	LH	1.42	N.S.	3.67	N.S.	11.72	<0.01
			RH	1.11	N.S.	2.4	N.S.	6.54	N.S.
	ARWIBO	FS	LH	1.41	N.S.	0.22	N.S.	3.26	N.S.
			RH	3.07	N.S.	0.79	N.S.	0.78	N.S.
		AA	LH	1.33	N.S.	5.75	N.S.	1.23	N.S.
			RH	2.77	N.S.	0.37	N.S.	0.65	N.S.
	Table Sup 7 shows the ACM-Adaboost (AA) and Freesurfer (FS) hippocampal variances according to the gender, years of education, and the presence of APOE4 allele predictors. In ADNI, FS is slightly influenced by the gender. In IBNA, AA is influenced by the APOE4 genetic status. In ARWIBO, neither FS nor AA are influenced by gender, edcuation and APOE4 status. These predictors accounted for a maximu…
